1 **Title:** GX-I7(rhIL-7-hyFc, efineptakin alfa), a long-acting IL-7, safely and effectively increased  
2 peripheral CD8<sup>+</sup> and CD4<sup>+</sup> T cells and TILs in patients with solid tumors

3  
4 **Authors and affiliations:** Gun Min Kim<sup>1,\*</sup>, Sojeong Kim<sup>2,3,\*</sup>, Myung Ah Lee<sup>4</sup>, Mi-Sun Byun<sup>5</sup>,  
5 Donghoon Choi<sup>6</sup>, Se Hwan Yang<sup>6</sup>, Jung Won Woo<sup>5</sup>, Young Chul Sung<sup>5</sup>, Eui-Cheol Shin<sup>2</sup>, Su-Hyung  
6 Park<sup>2,#</sup>, Tae Won Kim<sup>7,#</sup> and Joohyuk Sohn<sup>1,#</sup>

7  
8 <sup>1</sup>Division of Medical Oncology, Department of Internal Medicine, Yonsei Cancer Center, Yonsei  
9 University College of Medicine, Seoul, Korea

10 <sup>2</sup>Graduate School of Medical Science and Engineering, Korea Advanced Institute of Science and  
11 Technology, Daejeon, Korea

12 <sup>3</sup>Division of Hematology, Department of Internal Medicine, Yonsei University College of Medicine,  
13 Seoul, Republic of Korea.

14 <sup>4</sup>Division of Medical Oncology, Seoul St. Mary's Hospital, The catholic University of Korea., Seoul,  
15 Korea

16 <sup>5</sup>Genexine, Inc., Seoul, Korea

17 <sup>6</sup>NeoImmuneTech, Inc., Rockville, MD, USA

18 <sup>7</sup>Department of Oncology, University of Ulsan College of Medicine, Asan Medical Center, Seoul,  
19 Korea

20  
21 \* These authors contributed equally to this work.

22  
23 **Running title:** Safety and tolerability of GX-I7 in solid tumor patients

24  
25 **Keywords:** GX-I7, IL-7, hybrid Fc, lymphopenia, efineptakin alfa

26  
27 **#Corresponding author:** Joohyuk Sohn, Tae Won Kim, and Su-Hyung Park contributed equally to  
28 this work.

29  
30 Joohyuk Sohn, MD

31 Department of Internal Medicine, Yonsei Cancer Center,

32 Yonsei University College of Medicine, Seoul, Korea

33 Phone: (82) 2228-8131

34 Fax number: (82) 2228-8131

35 Email address: ONCOSOHN@yuhs.ac

36 **NOTE:** This preprint reports new research that has not been certified by peer review and should not be used to guide clinical practice.

37 Tae Won Kim, MD  
38 Department of Oncology, Asan Medical Center, University of Ulsan College of Medicine,  
39 Seoul, Korea  
40 Phone: (82)23010-3910 Fax number: (82) 24749027  
41 Email address: twkimmd@amc.seoul.kr

42  
43 Su-Hyung Park, PhD  
44 Graduate School of Medical Science and Engineering,  
45 Korea Advanced Institute of Science and Technology, Daejeon, Korea  
46 Phone: (82) 42-350-4248  
47 Fax number: (82) 42-350-4240;  
48 Email address: park3@kaist.ac.kr

49  
50 The authors declare no potential conflicts of interest.

51  
52 **Translational Relevance Statement:**

53 In animal studies, GX-I7 showed promising results by increasing peripheral lymphocyte counts, tumor  
54 infiltrating lymphocytes (TILs), and anti-tumor efficacy when administered either alone or in  
55 combination with cyclophosphamide or immune checkpoint inhibitors, such as anti-PD-(L)1 or anti-  
56 CTLA-4 antibodies. Based on the positive results from previous in vivo and phase 1 studies, the  
57 current study was designed to evaluate the safety, tolerability, pharmacokinetics (PK), and  
58 pharmacodynamics (PD) of GX-I7 in patients with locally advanced or metastatic solid tumors. These  
59 findings support the use of GX-I7 as a safe and effective T cell-amplifying agent to correct T cell  
60 deficiencies and improve the clinical outcomes of other anti-cancer agents. GX-I7 has the potential to  
61 be a promising therapeutic option for cancer patients as it can create a favorable environment for  
62 immune checkpoint inhibitors and other anti-cancer treatments to fight against cancer.

63  
64  
65  
66  
67  
68  
69  
70  
71  
72

73 **ABSTRACT**

74 **Purpose:** GX-I7 (rhIL-7-hyFc, efineptakin alfa) is a hybrid Fc-fused long-acting recombinant human  
75 interleukin-7 (IL-7) developed by Genexine, Inc. with the aim of correcting T-cell deficiency, thereby  
76 strengthening the immune response to fight against cancer. This Phase 1b trial (NCT03478995) was  
77 designed to assess the safety, tolerability, pharmacokinetics (PK), and pharmacodynamics (PD) of GX-  
78 I7 in patients with locally advanced or metastatic solid tumors.

79 **Methods:** This study consisted of two phases: dose-escalation and expansion. Eight dose groups were  
80 administered GX-I7 intramuscularly at doses ranging from 60 to 1700 µg/kg every three or six weeks.

81 **Results:** All regimens were safe and well tolerated, with the most frequently reported adverse drug  
82 reactions being injection site reactions, which were manageable with or without pharmacological  
83 intervention. GX-I7 demonstrated dose-dependent increases in the maximum serum concentration  
84 ( $C_{max}$ ) and area under the curve up to the last measurable concentration ( $AUC_{last}$ ). In addition, a dose-  
85 dependent increase in circulating CD8<sup>+</sup>/CD4<sup>+</sup> T cells was observed. In five patients who consented for  
86 biopsy, a statistically significant increase in tumor-infiltrating CD8<sup>+</sup>/CD4<sup>+</sup> T cell lymphocytes after  
87 GX-I7 treatment was observed.

88 **Conclusion:** These findings support the use of GX-I7 as a safe and effective T cell-amplifying agent  
89 capable of correcting T cell deficiencies. GX-I7 is expected to result in better clinical outcomes when  
90 used in combination with other anti-cancer agents by creating a better environment for immune  
91 checkpoint inhibitors and anti-cancer treatments to fight cancer.

92

93 **INTRODUCTION**

94 Surgery and chemotherapy have long been the two major modalities for cancer treatment, while  
95 chemotherapy is the sole option for patients with non-resectable advanced or metastatic solid tumors.  
96 However, with the emergence of immune therapies, such as immune checkpoint inhibitors (ICI), T cells  
97 have become a central focus in engaging the immune system in battle against cancer(1). Previous  
98 studies have revealed that lymphopenia (2), including anti-cancer treatment-induced lymphopenia, is  
99 associated with inferior survival outcomes (3-5). Furthermore, a low response to ICI therapy has been  
100 observed in patients with low lymphocyte count (6). As T cells play a central role in the immune  
101 response to cancer, correcting lymphopenia and increasing tumor infiltrating lymphocytes (TILs) are  
102 crucial in enhancing the immune response to cancer, thereby improving treatment outcomes (7, 8).

103 GX-I7 (rhIL-7-hyFc, efineptakin alfa) is a hybrid Fc-fused long-acting recombinant human interleukin-  
104 7 (IL-7) developed by Genexine, Inc., with the aim of correcting T cell deficiency, thereby  
105 strengthening the immune response to fight cancer and creating a favorable environment for anti-cancer  
106 treatment or ICIs. IL-7 is a homeostatic cytokine that plays an important role in the development,  
107 maintenance, proliferation, and regeneration of T-cells (9, 10). Despite the clinical benefits of IL-7 in  
108 various therapeutic areas, including cancer, the development of IL-7 as a commercial drug is limited

109 by its short half-life (11-19).  
110 GX-I7 effectively lengthens the IL-7 half-life by six times compared to that of rhIL-7 via neonatal Fc  
111 receptor (FcRn)-mediated recycling (20, 21). In vivo, GX-I7 led to an increase in peripheral  
112 lymphocyte counts and TILs when administered either in monotherapy or combination therapy with  
113 cyclophosphamide (CPA) or ICI (e.g., anti-PD-(L)1 or anti-CTLA-4 antibody), and showed anti-tumor  
114 efficacy in murine syngeneic tumor models (22).  
115 With in vivo and clinical Phase 1 study results supporting further development of GX-I7 to correct T  
116 cell deficiencies, this study was designed to assess safety, tolerability, pharmacokinetics (PK) and  
117 pharmacodynamics (PD) of GX-I7 in patients with locally advanced or metastatic solid tumors.

## 118 119 **RESEARCH DESIGN AND METHODS**

### 120 *Ethics statement*

121 This study was approved by the institutional review board of each research site (Yonsei University  
122 Health System Severance Hospital, Seoul Asan Medical Center and Catholic Medical Center) and  
123 conducted in full accordance with the Declaration of Helsinki and Korean Good Clinical Practice  
124 (www.clinicaltrials.gov registration number: NCT03478995). Written informed consent was obtained  
125 from all patients prior to conducting any study-related procedures.

### 126 *Study design*

127 This was a Phase 1b, open-label, dose-escalation study to evaluate the safety, tolerability, PK, and PD  
128 of GX-I7 in patients with locally advanced or metastatic solid tumors. The primary objectives were to  
129 determine the recommended phase 2 dose (RP2D) and maximum tolerated dose (MTD) and to  
130 characterize dose-limiting toxicities (DLTs). Classic 3+3 design was adopted for sequential dose  
131 escalation, and the DLT evaluation period was 3 weeks.

### 132 *Patients*

133 Eligible patients were aged  $\geq 19$  years and had an Eastern Cooperative Oncology Group (ECOG)  
134 performance status of 0 or 1, an estimated life expectancy of  $> 12$  weeks, and appropriate hematologic,  
135 hepatic, and end-organ function values. Patients had histological documentation of locally advanced,  
136 recurrent, or metastatic incurable solid tumors that had failed to know or available therapy, or for whom  
137 standard therapy was considered inappropriate. Exclusion criteria included any anti-tumor therapy  
138 within three weeks and previous use of an ICI or immunomodulatory monoclonal antibody (mAb)-  
139 derived drug within 12 weeks prior to the initiation of study treatment.

### 140 *Treatment*

141 Patients were enrolled to receive GX-I7 intramuscularly at three- or six-week intervals. The dose was  
142 escalated, and a total of eight dose levels were tested, each with at least three patients, at doses of 60,  
143 120, 240, 480, 720, 960, 1200, and 1700  $\mu\text{g}/\text{kg}$  at three-week intervals. Out of the eight tested dose  
144 levels, two (720 and 1200  $\mu\text{g}/\text{kg}$ ) were selected as potential RP2D for expansion, and up to six

145 additional patients were enrolled at these doses for the expansion phase. At a dose expansion of 1200  
146  $\mu\text{g}/\text{kg}$ , the efficacy of GX-I7 was evaluated at both three- and six-week intervals. For biopsy-consented  
147 patients, tumor tissue was collected both pre and three–five weeks after post-GX-I7 administration to  
148 test changes in TILs.

#### 149 ***Safety, tolerability, and immunogenicity assessments***

150 The safety and tolerability of GX-I7 were assessed throughout the study by adverse event (AE)  
151 monitoring using the NCI Common Terminology Criteria for Adverse Events (CTCAE) (version 4.03).  
152 Undesirable symptoms, clinically significant abnormalities in clinical laboratory tests, vital signs,  
153 physical examination, or DLT, as well as the emergence of antibodies (anti-drug antibody [ADA] and  
154 neutralizing antibody [nAb]) were included. Treatment-emergent adverse events (TEAEs) were  
155 analyzed. The presence of antibodies against GX-I7 was determined using a validated enzyme-linked  
156 immunosorbent assay (ELISA), as described in the GX-I7 Phase 1 First-in-human (FIH) study (22).  
157 All patients who tested positive for ADA were analyzed for its neutralizing property (nAb).

#### 158 ***Efficacy***

159 Solid tumor assessments were performed by CT scan or MRI every 2 cycles up to cycle 8, and every  
160 four cycles or as clinically indicated thereafter. Tumor response and progression were evaluated  
161 according to the Response Evaluation Criteria in Solid Tumors (RECIST) (version 1.1).

#### 162 ***PK analysis***

163 Blood samples for PK analysis were collected during Cycle 1 while the patients were hospitalized at  
164 various time points, including pre-dose and 0.5, 6, 12, 24, 48, and 72hours post-dose. Additional blood  
165 collections were performed on Cycle 1 Day 8 (C1D8), C1D15, and C2D1 for patients administered  
166 GX-I7 every 3 weeks and C1D8, C1D15, C1D22, and C2D1 for patients administered GX-I7 every 6  
167 weeks. Serum IL-7 concentrations were measured using the Quantikine HS ELISA Human IL-7  
168 immunoassay kit (R&D Systems, Minneapolis, MN), and the detailed analysis method was based on a  
169 previously reported phase 1 study (22). The PK parameters were derived by a non-compartmental  
170 method using Phoenix WinNonlin software (version 7.0, Certara, St. Louis, MO, USA). In addition,  
171 the correlation between the administered dose and  $\text{AUC}_{\text{last}}$  and  $\text{C}_{\text{max}}$  was analyzed.

#### 172 ***PD analysis***

173 The PD variables were changes in absolute lymphocyte counts (ALC) and subsets of immune cells (T,  
174 B, and NK cells) in the blood assessed on a weekly basis at pre-dose, C1D1, and C2D1. Thereafter, it  
175 was performed on day 1 (pre-dose) of every cycle and at the treatment discontinuation (DC) visit.  
176 Absolute T, B, and NK cell counts were calculated using ALCs multiplied by the proportions of  $\text{CD3}^+$ ,  
177  $\text{CD19}^+$  and  $\text{CD56}^+$  cells against total lymphocytes, and absolute  $\text{CD4}^+$  and  $\text{CD8}^+$  T cells were calculated  
178 using ALCs multiplied by the proportions of  $\text{CD4}^+$  and  $\text{CD8}^+$  T cells against total  $\text{CD3}^+$  T cells,  
179 respectively.  $\text{Ki67}^+$  and  $\text{CD127}^+$  T cell counts were calculated by multiplying the proportion of  $\text{Ki67}^+$ -  
180 or  $\text{CD127}^+$ -expressing cells by total  $\text{CD4}^+$  and  $\text{CD8}^+$  T cells, respectively. All analyses were performed

181 using multicolor flow cytometry. The following anti-human fluorochrome-conjugated antibodies were  
182 used: anti-CD3- Alexa Fluor 700 (UCHT1), anti-IL-7R $\alpha$ -BV421 (A019D5), anti-CD4-PE-Cy5  
183 (OKT4), anti-CD45RA-APC-Cy7 (HI100), anti-CCR7-BV785 (G043H7), anti-CD25-BV650 (BD96;  
184 BioLegend), anti-CD19-BV711 (SJ25C1), anti-CD14-BV711 (M $\phi$ P9), anti-CD8-Alexa Fluor 700  
185 (RPA-T8; all from BD Biosciences), and anti-CD56-APC (CMSSB; Thermo Fisher). Simultaneously,  
186 dead cells were stained using a Live/Dead Fixable Red Dead Cell Stain Kit (Thermo Fisher Scientific).  
187 The cells were fixed and permeabilized using a Foxp3 Staining Buffer Set (Thermo Fisher), and  
188 intracellular molecules were stained (4 °C, 20 min) using anti-Ki-67-PE-Cy7 (20Raj1) and anti-Foxp3-  
189 PE (236A/E7; Thermo Fisher) (Supplementary material). To calculate the maximum ALC and the area  
190 under the ALC-time curve until the last sampling time, the Phoenix WinNonlin software was used after  
191 correcting the baseline values. The change in TILs at pre and post GX-I7 administration was evaluated  
192 in patients who consented to biopsy using Multiplex IHC analysis (Supplementary Material).

### 193 ***Statistical analysis***

194 All demographic characteristics and PK and PD parameters were summarized using descriptive  
195 statistics. Continuous variables were summarized using the number of observations, mean, standard  
196 deviation, coefficient of variation, median, and range as appropriate. Categorical values were  
197 summarized using the number of observations and percentages as appropriate. Data were summarized  
198 for the dose cohort, expansion cohort, and total patient population. All assessments before the first  
199 dose of the study drug were considered as baseline. If multiple baseline assessments were performed,  
200 the most recent assessment was used for statistical analysis. A parametric or nonparametric method  
201 was used based on the results of the normality test. All analyses were 2-sided, with a significance  
202 level of 5%, and a 95% confidence interval (CI) was calculated. All statistical analyses were  
203 performed using SAS® Version 9.4 (SAS Institute, Cary, NC, USA).

204

## 205 **RESULTS**

### 206 ***Patients disposition and baseline characteristics***

207 Out of 42 patients screened across three hospitals, 35 patients were enrolled in the study and received  
208 at least one dose of GX-I7, with seven patients being excluded because they either did not satisfy the  
209 eligibility criteria (five patients) or withdrew their consent (two patients). In the dose escalation phase,  
210 according to the classical 3 + 3 design, 3 patients were assigned to each group. In the 1700  $\mu$ g/kg group,  
211 only two patients were enrolled because of the occurrence of one DLT. The group receiving 720  $\mu$ g/kg,  
212 which showed the highest increase in ALC fold change, and 1200  $\mu$ g/kg as the maximum tolerated  
213 dose (MTD) was selected as the potential recommended phase 2 dose (RP2D). Three patients receiving  
214 720  $\mu$ g/kg group every 3 weeks (q3w), three patients receiving 1200  $\mu$ g/kg q3w, and six patients  
215 receiving 1200  $\mu$ g/kg q6w were enrolled in the dose expansion (Figure 1). A dose expansion group  
216 receiving GX-I7 q6w was included after determining that since the ALC remained elevated at the time

217 of the q3w repeated dosing, it was not expected that frequent administration of GX-I7 would bring  
218 additional benefits. The median age (range) was 58 (40-75) years; 54% were male, and all were Asian.  
219 Baseline ECOG performance status was 0 in 49% of patients, and the most common site of the primary  
220 tumor was colon/rectal in 66% of patients, followed by the breast in 11%, and the ovary in 9% of  
221 patients. At the time of study enrollment, metastatic lesions were commonly found in the lungs (32  
222 patients), followed by the liver (24 patients), and lymph nodes (14 patients). All subjects enrolled in  
223 the study were at stage IV with a third or more lines of treatment. In previous therapies, the majority  
224 of subjects had been treated with antimetabolite, targeted, and platinum-based agents. The subjects  
225 discontinued their previous treatment primarily because of disease progression (PD). The demographic  
226 and baseline characteristics are summarized in Table 1.

### 227 ***Safety***

228 The safety analysis set included patients who received at least one dose of GX-I7 during the clinical  
229 trial. Safety data from all 35 enrolled patients were used to assess the safety profiles. GX-I7  
230 intramuscular administration was safe and well tolerated across doses ranging from 60 to 1200 µg/kg,  
231 except for the 1700 µg/kg dose. A total of 225 TEAEs occurred in all the 35 patients (100%). Among  
232 these, 116 adverse drug reactions (ADRs) occurred in 28 of 35 patients (80.0%), with the majority rated  
233 as Grade 1 and 2 (68 and 43 cases, respectively). The most frequently reported ADR was injection site  
234 reaction (61 cases in 25 patients (71.4%)), followed by pyrexia with 21 cases in 12 patients (34.3%),  
235 then rash with 8 cases in 7 patients (20.0%). All 61 reported injection site reactions were classified as  
236 grade 1 or 2, and most were spontaneously resolved, with 32 cases being resolved with medications.  
237 No cases of grade 3 or 4 injection site reactions were observed.

238 In the 720, 1200, and 1700 µg/kg groups, grade 3 or higher ADRs were reported: fatigue (720 and 1200  
239 µg/kg), hypersensitivity, and anaphylactic reactions (1700 µg/kg). Due to grade 3 fatigue and  
240 anaphylactic reaction, two patients discontinued GX-I7 permanently. No GX-I7 related death have been  
241 reported.

242 The dose-limiting toxicity of GX-I7 was assessed in 35 patients for all dose groups, and at 1700 µg/kg,  
243 one out of two patients experienced DLT, which was a case of Grade 3 or higher hypersensitivity.  
244 Therefore, the MTD was determined to be 1200 µg/kg, and this dose administered every 6 weeks was  
245 selected as RP2D. Regardless of the administration interval, the incidence of ADA increased on day  
246 21, and no ADA-related AE were observed. A summary of the safety profile is presented in Table 2.

### 247 ***Tumor response***

248 Of the 35 patients with solid tumors who underwent dose escalation and expansion, 6 patients (18.75%)  
249 showed disease control as stable disease (SD). Among these six patients, the doses received were 60,  
250 120, 240, 720, and 1200 µg/kg, as shown in Supplementary Table S1. The median PFS was 5.69 weeks  
251 (95% CI; 5.13, 5.98).

### 252 ***Pharmacokinetics (PK)***

253 This study conducted a PK analysis of 35 patients from all cohorts. As shown in Figure 2A, serum  
254 concentration was measured at various time points after intramuscular administration of GX-I7,  
255 ranging from 60 to 1700  $\mu\text{g}/\text{kg}$ . The PK profile of GX-I7 showed a dose-dependent response. The peak  
256 serum concentration ( $C_{\text{max}}$ ) was reached at 11–47.5 hours post dosing, with peak serum concentration  
257 ranging from 2.11 to 76.5 ng/mL, and a half-life lasting from 60.8 to 139.7 hours (Supplementary Table  
258 S2).  $\text{AUC}_{\text{last}}$  and  $C_{\text{max}}$  increased linearly with dose ( $R^2 = 0.9174$  and  $0.9657$ , respectively; Figure 2B  
259 and 2C).

### 260 **Pharmacodynamics (PD)**

261 PD analyses were performed for changes in the absolute lymphocyte count (ALC) and lymphocyte  
262 subsets. The ALC,  $\text{CD4}^+$  and  $\text{CD8}^+$  T cell counts showed a statistically significant increase at C1D21  
263 compared to the baseline at all dose levels: 60-120, 240-480, 720-960 and 1200-1700  $\mu\text{g}/\text{kg}$  groups  
264 ( $*p < 0.05$ ,  $**p < 0.01$ ,  $***p < 0.001$ , Figure 3A) in a dose-dependent manner. In contrast, GX-I7  
265 administration did not cause significant changes in B or NK cells (Figure 3B). These results are  
266 consistent with previously reported findings (23). Increases in ALC were observed in both lymphopenic  
267 and non-lymphopenic patients ( $*p < 0.05$ ,  $****p < 0.0001$ , respectively; Figure 3C).

268 To evaluate the potential mechanism by which GX-I7 increases lymphocyte counts,  $\text{Ki67}^+\text{CD4}^+$  T cells  
269 and  $\text{Ki67}^+\text{CD8}^+$  T cells were measured. Their percentage peaked on day 7 after treatment and showed  
270 a dose-dependent and statistically significant increase in all the groups (Figure 3D). IL-7 binds to IL-7  
271 receptor  $\alpha$  (CD127) expressed on the surface of T cells, and CD127 is downregulated or internalized  
272 when T cells are over-activated by IL-7 (transcytosis). Indeed, there was a significant but transient  
273 decrease in  $\text{CD127}^+\text{CD4}^+$  and  $\text{CD127}^+\text{CD8}^+$  T cells on day 7 compared with day 0 in each group.  
274 However, these decreases were restored at three weeks post dose (Figure 3E). Previous clinical studies  
275 of rhIL-7 in HIV-infected or refractory cancer patients revealed that the relative frequency of regulatory  
276 T cells ( $T_{\text{reg}}$ ) expressing low-level CD127 was reduced due to IL-7-induced expansion of conventional  
277 T-cells (24, 25). Consistent with previous studies, the ratio of  $\text{CD4}^+$  and  $\text{CD8}^+$  T cells to regulatory T  
278 cells on day 21 after GX-I7 administration compared to baseline showed an increasing trend, and the  
279 increase was statistically significant in the 240-480 and 1200-1700  $\mu\text{g}/\text{kg}$  groups (Figure 3F). Figure  
280 3G shows the average fold-change of  $\text{CD4}^+$  and  $\text{CD8}^+$  T cell subtypes at day 21 after GX-I7  
281 administration compared to the baseline. While all  $\text{CD4}^+$  and  $\text{CD8}^+$  T cell subsets, including naïve,  
282 central memory (CM), and effector memory (EM) T cells, showed significantly increased numbers  
283 after GX-I7 administration, notable increases in the number were observed for naïve  $\text{CD8}^+$  and  $\text{CD4}^+$   
284 T cells.

285 Pre and post-treatment tumor biopsies were collected from five patients who consented to the  
286 intervention to evaluate changes in the number of tumor-infiltrating lymphocytes (TILs). Multiplex  
287 IHC was used in this study, and all biopsies were collected in the third week after the first injection or  
288 the second week after the second injection of GX-I7. A statistically significant increase in  $\text{CD8}^+/\text{CD4}^+$



289 TILs was observed after GX-I7 treatment (720  $\mu\text{g}/\text{kg}$  group, 1 patient; 1200  $\mu\text{g}/\text{kg}$  group; four patients)  
290 (Figure 4A). Figure 4B shows a representative image of tumor tissue from a patient treated at 1200  
291  $\mu\text{g}/\text{kg}$ , demonstrating increased CD4<sup>+</sup> and CD8<sup>+</sup> T cell infiltration at week 3 compared to baseline.

292

## 293 **DISCUSSION**

294 This is the first phase 1 study to evaluate the safety, tolerability, pharmacokinetics (PK), and  
295 pharmacodynamics (PD) of GX-I7 in patients with locally advanced or metastatic incurable solid  
296 tumors. GX-I7 was shown to be safe and well tolerated in a wide range of doses, ranging from 60 to  
297 1200  $\mu\text{g}/\text{kg}$ , at 3- or 6-week intervals. Tolerability and safety were confirmed in GX-I7 single  
298 subcutaneous and intramuscular dose-escalation tests in healthy subjects (23). This clinical trial was  
299 conducted to confirm the safety and tolerability of GX-I7 in patients with locally advanced, recurrent,  
300 or metastatic incurable solid tumors. The most common adverse event and adverse drug reactions in  
301 all dose groups were injection site reactions, which were also observed following the administration of  
302 other cytokine products (26). There were no adverse events, such as a serious injection site reaction,  
303 which would result in permanent discontinuation of GX-I7 treatment. MTD and RP2D were confirmed  
304 to be 1200  $\mu\text{g}/\text{kg}$  based on the dose-limiting toxicity in each GX-I7 dose group. The DLT that occurred  
305 was one subject with grade 3 or higher hypersensitivity in the 1700  $\mu\text{g}/\text{kg}$  group. Since the safety and  
306 tolerability of GX-I7 up to 1200  $\mu\text{g}/\text{kg}$  have been established in patients with chemorefractory solid  
307 tumors, it is expected that it can be safely administered in combination with other anticancer drugs. For  
308 efficacy analysis, anti-tumor activity was assessed in 32 patients who received at least one dose of GX-  
309 I7 and completed one cycle of treatment with measurable disease. Six patients (18.75%) showed stable  
310 disease (SD), and the median progression-free survival (mPFS) was 5.69 weeks (95% CI:5.13 - 5.98  
311 weeks), with similar mPFS between groups. GX-I7 is a safe and effective T-cell amplifier. Although  
312 the primary objective of the study was safety and the number of patients enrolled was low, GX-I7  
313 monotherapy showed a modest clinical benefit, with six patients having stable disease, indicating the  
314 need for further studies, in monotherapy or in combination with other immunotherapies, to establish its  
315 clinical efficacy in larger trials.

316 The PK profile provided evidence that GX-I7 is a long-acting IL-7 with a dose-dependent increase in  
317 systemic exposure, as indicated by  $C_{\text{max}}$  and  $\text{AUC}_{\text{last}}$ . PD analyses demonstrated that GX-I7 is capable  
318 of increasing the absolute lymphocyte counts (ALC), CD4<sup>+</sup> and CD8<sup>+</sup> T cells in a dose-dependent  
319 manner but does not affect B cell counts. The increase in ALC, as assessed by  $\Delta E_{\text{max}}$  and  $\Delta\text{AUEC}$ , was  
320 positively correlated with systemic exposure to GX-I7, as indicated by  $C_{\text{max}}$  and  $\text{AUC}_{\text{last}}$   
321 (Supplementary Figure S1). In five available paired biopsies, GX-I7 also showed the ability to increase  
322 the number of tumor-infiltrating lymphocytes (TILs) of the CD4 and CD8 subtypes. ADA emergence  
323 was observed regardless of the dose and dosing interval, but it did not have an impact on the safety of  
324 GX-I7. The final RP2D was determined to be 1200  $\mu\text{g}/\text{kg}$  based on the maximum observed change in

325 ALC, used as a pharmacodynamic marker, within a dose range that demonstrated safety and tolerability.  
326 The increase in Ki67 expression and downregulation of CD127 provided evidence that the increase in  
327 ALC and T cells is due to the direct mechanism of action of GX-I7. Administration of GX-I7 resulted  
328 in an improvement in the CD4<sup>+</sup> T cell/T<sub>reg</sub> and CD8<sup>+</sup> T cell/T<sub>reg</sub> ratios, generating a favorable  
329 environment for enhanced immune activity.

330 In this study, most patients received at least two or more doses of GX-I7 at 3-week intervals. However,  
331 starting from the second repeated dosing, there was no observed increase in proliferation markers such  
332 as Ki67 in T cells and ALC (Supplementary Figure S2A). Based on these results, GX-I7 was  
333 administered at 6-week intervals at a dose of 1200 µg/kg in the expansion phase. As shown in  
334 Supplementary Figure S2B, the levels of Ki67<sup>+</sup>CD4<sup>+</sup> and Ki67<sup>+</sup>CD8<sup>+</sup> T cells, as well as the ALC level  
335 (although data from only one patient was available), increased in the blood following repeated dosing  
336 of GX-I7 at 6-week intervals. It was not possible to obtain long-term follow-up results of repeated  
337 dosing, as most of the patients participating in this clinical trial had late-stage cancer with very short  
338 life expectancies. For this reason, an animal study was conducted as a supportive measure in normal  
339 cynomolgus monkeys, and it showed that when the monkeys were repeatedly administered GX-I7 at a  
340 dose of 3 mg/kg with intervals of 6, 9, and 12-weeks, the proliferation markers and ALC showed a  
341 tendency to increase when administered at intervals of 6-week or longer (Supplementary figure S3).  
342 Therefore, the dosing interval can be considered an important factor that may affect the PD profile of  
343 GX-I7. Subsequent studies with GX-I7 administered GX-I7 with dosing intervals of 6 weeks or longer.  
344 ADA occurs in more than 90% of patients after receiving a dose of GX-I7, which is consistent with  
345 previous findings in healthy adults. In Phase 1 clinical trials in healthy volunteers, ADA was observed  
346 in most patients (75-100%) approximately 10 days after GX-I7 administration, but most of these  
347 antibodies disappeared within 330 days of follow-up.

348 In the present study, repeated administration of GX-I7 at 6-week intervals demonstrated an increase in  
349 proliferation markers, despite the presence of ADA. Similarly, in the monkey study, repeated  
350 administration of GX-I7 for 6-week or longer resulted in increased expression of proliferation markers,  
351 even in the presence of ADA (Supplementary Figure S3, Supplementary Table S3). These results  
352 indicate that ADA production does not affect the ability of GX-I7 to increase ALC; however, further  
353 studies involving a larger number of patients with longer treatment durations are warranted to confirm  
354 these findings. The main pharmacodynamic response of GX-I7 in biological systems is an increase in  
355 ALC. However, it is still under investigation whether this GX-I7-related boost in ALC directly leads to  
356 increased TIL and mediates clinical efficacy. In the present study, as part of this investigation, multiplex  
357 IHC analysis was performed on a small number of patients whose tumors were biopsied, and an  
358 increase in CD4<sup>+</sup> and CD8<sup>+</sup> T cells was observed within the tumor tissues at 3 or 5 weeks after GX-I7  
359 administration. Thus, GX-I7 as a T-cell amplifier provides a unique opportunity for immuno-oncology  
360 combination strategies by reconstituting persistent T-cells.

361 These findings support the use of GX-I7 as a safe and effective T cell-amplifying agent for correcting  
362 T cell deficiency. Studies are ongoing to evaluate the clinical efficacy of GX-I7 when used in  
363 combination with other anti-cancer agents. Novel combinations with GX-I7 have the potential to  
364 improve the tumor microenvironment and enhance the efficacy of ICI and other anti-cancer treatments  
365 to fight cancer.

## 367 **ACKNOWLEDGMENTS**

368 This work was supported by Bio-Teller, who provided scientific advice for this clinical research.

## 370 **REFERENCE**

- 371 1. Waldman AD, Fritz JM, Lenardo MJ. A guide to cancer immunotherapy: from T cell basic  
372 science to clinical practice. *Nat Rev Immunol*. Nature Publishing Group; 2020;20:651–68.
- 373 2. Ménétrier-Caux C, Ray-Coquard I, Blay J-Y, Caux C. Lymphopenia in Cancer Patients and its  
374 Effects on Response to Immunotherapy: an opportunity for combination with Cytokines?  
375 *Journal for ImmunoTherapy of Cancer*. 2019;7:85.
- 376 3. Venkatesulu BP, Mallick S, Lin SH, Krishnan S. A systematic review of the influence of  
377 radiation-induced lymphopenia on survival outcomes in solid tumors. *Crit Rev Oncol Hematol*.  
378 2018;123:42–51.
- 379 4. Grossman SA, Ellsworth S, Campian J, Wild AT, Herman JM, Laheru D, et al. Survival in  
380 Patients With Severe Lymphopenia Following Treatment With Radiation and Chemotherapy for  
381 Newly Diagnosed Solid Tumors. *J Natl Compr Canc Netw*. 2015;13:1225–31.
- 382 5. Kim CG, Kim MH, Kim JH, Kim S-G, Kim GM, Kim TY, et al. On-treatment derived  
383 neutrophil-to-lymphocyte ratio and survival with palbociclib and endocrine treatment: analysis  
384 of a multicenter retrospective cohort and the PALOMA-2/3 study with immune correlates.  
385 *Breast Cancer Res*. 2023;25:4.
- 386 6. Diehl A, Yarchoan M, Hopkins A, Jaffee E, Grossman SA. Relationships between lymphocyte  
387 counts and treatment-related toxicities and clinical responses in patients with solid tumors  
388 treated with PD-1 checkpoint inhibitors. *Oncotarget*. 2017;8:114268–80.
- 389 7. Lohr J, Ratliff T, Huppertz A, Ge Y, Dictus C, Ahmadi R, et al. Effector T-cell infiltration  
390 positively impacts survival of glioblastoma patients and is impaired by tumor-derived TGF- $\beta$ .  
391 *Clin Cancer Res*. 2011;17:4296–308.
- 392 8. Martens A, Wistuba-Hamprecht K, Yuan J, Postow MA, Wong P, Capone M, et al. Increases in  
393 Absolute Lymphocytes and Circulating CD4<sup>+</sup> and CD8<sup>+</sup> T Cells Are Associated with Positive  
394 Clinical Outcome of Melanoma Patients Treated with Ipilimumab. *Clin Cancer Res*.  
395 2016;22:4848–58.
- 396 9. Fry TJ, Mackall CL. The many faces of IL-7: from lymphopoiesis to peripheral T cell

- 397 maintenance. *J Immunol.* 2005;174:6571–6.
- 398 10. Surh CD, Sprent J. Homeostasis of naive and memory T cells. *Immunity.* 2008;29:848–62.
- 399 11. Sereti I, Estes JD, Thompson WL, Morcock DR, Fischl MA, Croughs T, et al. Decreases in  
400 colonic and systemic inflammation in chronic HIV infection after IL-7 administration. *PLoS*  
401 *Pathog.* 2014;10:e1003890.
- 402 12. Trédan O, Ménétrier-Caux C, Ray-Coquard I, Garin G, Cropet C, Verronèse E, et al. ELYPSE-  
403 7: a randomized placebo-controlled phase IIa trial with CYT107 exploring the restoration of  
404 CD4<sup>+</sup> lymphocyte count in lymphopenic metastatic breast cancer patients. *Ann Oncol.*  
405 2015;26:1353–62.
- 406 13. Sheikh V, Porter BO, DerSimonian R, Kovacs SB, Thompson WL, Perez-Diez A, et al.  
407 Administration of interleukin-7 increases CD4 T cells in idiopathic CD4 lymphocytopenia.  
408 *Blood.* 2016;127:977–88.
- 409 14. Mazzucchelli R, Durum SK. Interleukin-7 receptor expression: intelligent design. *Nat Rev*  
410 *Immunol.* Nature Publishing Group; 2007;7:144–54.
- 411 15. Thiébaud R, Jarne A, Routy J-P, Sereti I, Fischl M, Ive P, et al. Repeated Cycles of Recombinant  
412 Human Interleukin 7 in HIV-Infected Patients With Low CD4 T-Cell Reconstitution on  
413 Antiretroviral Therapy: Results of 2 Phase II Multicenter Studies. *Clin Infect Dis.*  
414 2016;62:1178–85.
- 415 16. Levy Y, Lacabaratz C, Weiss L, Viard J-P, Goujard C, Lelièvre J-D, et al. Enhanced T cell  
416 recovery in HIV-1-infected adults through IL-7 treatment. *J Clin Invest.* 2009;119:997–1007.
- 417 17. Alstadhaug KB, Croughs T, Henriksen S, Leboeuf C, Sereti I, Hirsch HH, et al. Treatment of  
418 progressive multifocal leukoencephalopathy with interleukin 7. *JAMA Neurol.* 2014;71:1030–  
419 5.
- 420 18. Zhong H, Xibing G, Yaping D, Zheng W, Decai F, Xiaoye G, et al. Interleukin-7 in Patients  
421 With Chronic Hepatitis B May Have Effect on T Follicular Helper Cells and Specific Cellular  
422 Immunity. *Hepat Mon.* 2016;16:e36068.
- 423 19. Hou H, Kang Y, Zeng Y, Li Y, Shang J. Interleukin-7 augments CD8<sup>+</sup> T cells function and  
424 promotes viral clearance in chronic hepatitis C virus infection. *Cytokine.* 2018;102:26–33.
- 425 20. Levin D, Golding B, Strome SE, Sauna ZE. Fc fusion as a platform technology: potential for  
426 modulating immunogenicity. *Trends Biotechnol.* 2015;33:27–34.
- 427 21. Abdiche YN, Yeung YA, Chaparro-Riggers J, Barman I, Strop P, Chin SM, et al. The neonatal  
428 Fc receptor (FcRn) binds independently to both sites of the IgG homodimer with identical  
429 affinity. *MAbs.* 2015;7:331–43.
- 430 22. Kim J-H, Kim Y-M, Choi D, Jo S-B, Park HW, Hong S-W, et al. Hybrid Fc-fused interleukin-7  
431 induces an inflamed tumor microenvironment and improves the efficacy of cancer  
432 immunotherapy. *Clin Transl Immunology.* 2020;9:e1168.

- 433 23. Lee SW, Choi D, Heo M, Shin E-C, Park S-H, Kim SJ, et al. hIL-7-hyFc, A Long-Acting IL-7,  
434 Increased Absolute Lymphocyte Count in Healthy Subjects. *Clin Transl Sci.* 2020;13:1161–9.
- 435 24. Rosenberg SA, Sportès C, Ahmadzadeh M, Fry TJ, Ngo LT, Schwarz SL, et al. IL-7  
436 Administration to Humans Leads to Expansion of CD8<sup>+</sup> and CD4<sup>+</sup> Cells but a Relative Decrease  
437 of CD4<sup>+</sup> T-Regulatory Cells. *J Immunother.* 2006;29:313–9.
- 438 25. Sereti I, Dunham RM, Spritzler J, Aga E, Proschan MA, Medvik K, et al. IL-7 administration  
439 drives T cell–cycle entry and expansion in HIV-1 infection. *Blood.* 2009;113:6304–14.
- 440 26. Francois B, Jeannet R, Daix T, Walton AH, Shotwell MS, Unsinger J, et al. Interleukin-7  
441 restores lymphocytes in septic shock: the IRIS-7 randomized clinical trial. *JCI Insight.*  
442 2018;3:e98960, 98960.

443  
444  
445  
446  
447  
448  
449  
450  
451  
452  
453  
454  
455  
456  
457  
458  
459  
460  
461  
462  
463  
464  
465  
466  
467  
468



470 Table 1. Baseline characteristics.

| Group                                 | GX-17<br>60 µg/kg<br>(n=3) | GX-17<br>120 µg/kg<br>(n=3) | GX-17<br>240 µg/kg<br>(n=3) | GX-17<br>480 µg/kg<br>(n=3) | GX-17<br>720 µg/kg<br>(n=6) | GX-17<br>960 µg/kg<br>(n=3) | GX-17<br>1200 µg/kg<br>(n=12) | GX-17<br>1700 µg/kg<br>(n=2) | Total<br>(n=35) |
|---------------------------------------|----------------------------|-----------------------------|-----------------------------|-----------------------------|-----------------------------|-----------------------------|-------------------------------|------------------------------|-----------------|
| <b>Age (years)</b>                    |                            |                             |                             |                             |                             |                             |                               |                              |                 |
| Median (Min, Max)                     | 58 (52, 64)                | 58 (55, 58)                 | 59 (52, 75)                 | 44 (44, 48)                 | 57 (45, 71)                 | 58 (45, 65)                 | 62 (43, 75)                   | 54 (48, 60)                  | 58 (40, 75)     |
| <b>Gender, N (%)</b>                  |                            |                             |                             |                             |                             |                             |                               |                              |                 |
| Male                                  | 2 (67)                     | 0                           | 3 (100)                     | 2 (67)                      | 4 (67)                      | 1 (33)                      | 6 (50)                        | 1 (50)                       | 19 (54)         |
| <b>Race, N (%)</b>                    |                            |                             |                             |                             |                             |                             |                               |                              |                 |
| Asian                                 | 3 (100)                    | 3 (100)                     | 3 (100)                     | 3 (100)                     | 6 (100)                     | 3 (100)                     | 12 (100)                      | 2 (100)                      | 35 (100)        |
| <b>ECOG performance status, N (%)</b> |                            |                             |                             |                             |                             |                             |                               |                              |                 |
| 0                                     | 1 (33)                     | 1 (33)                      | 1 (33)                      | 0                           | 5 (83)                      | 2 (67)                      | 5 (42)                        | 2 (100)                      | 17 (49)         |
| 1                                     | 2 (67)                     | 2 (67)                      | 2 (67)                      | 3 (100)                     | 1 (17)                      | 1 (33)                      | 7 (58)                        | 0                            | 18 (51)         |
| <b>Site of Primary Tumor, N (%)</b>   |                            |                             |                             |                             |                             |                             |                               |                              |                 |
| Breast                                | 1 (33)                     | 0                           | 0                           | 1 (33)                      | 0                           | 0                           | 2 (17)                        | 0                            | 4 (11)          |
| Colon/Rectal                          | 1 (33)                     | 2 (67)                      | 2 (67)                      | 2 (67)                      | 4 (67)                      | 3 (100)                     | 7 (58)                        | 2 (100)                      | 23 (66)         |
| Ovary                                 | 0                          | 1 (33)                      | 0                           | 0                           | 0                           | 0                           | 2 (17)                        | 0                            | 3 (9)           |
| Other                                 | 1 (33)                     | 0                           | 1 (33)                      | 0                           | 2 (33)                      | 0                           | 1 (8)                         | 0                            | 5 (14)          |
| <b>Location of Metastatic, N</b>      |                            |                             |                             |                             |                             |                             |                               |                              |                 |
| Abdominal Wall                        | 0                          | 1                           | 0                           | 0                           | 1                           | 1                           | 1                             | 0                            | 4               |
| Adrenal Gland                         | 1                          | 0                           | 1                           | 0                           | 0                           | 0                           | 1                             | 0                            | 3               |
| Bone                                  | 1                          | 0                           | 0                           | 1                           | 1                           | 0                           | 1                             | 0                            | 4               |
| Brain                                 | 0                          | 0                           | 0                           | 1                           | 0                           | 0                           | 1                             | 0                            | 2               |
| Liver                                 | 2                          | 2                           | 2                           | 2                           | 1                           | 3                           | 10                            | 2                            | 24              |

|            |   |   |   |   |   |   |    |   |    |
|------------|---|---|---|---|---|---|----|---|----|
| Lung       | 3 | 2 | 3 | 3 | 5 | 3 | 11 | 2 | 32 |
| Lymph Node | 2 | 2 | 1 | 2 | 3 | 2 | 2  | 0 | 14 |
| Pleura     | 1 | 0 | 0 | 0 | 0 | 0 | 1  | 0 | 2  |
| Other      | 2 | 0 | 2 | 1 | 2 | 2 | 4  | 0 | 13 |

471  
472  
473  
474  
475  
476  
477  
478  
479  
480  
481  
482  
483  
484  
485  
486  
487  
488  
489  
490  
491  
492  
493  
494  
495  
496  
497  
498



499 Table 2. Summary of safety profiles

| Group                                                                  | GX-I7<br>60 µg/kg<br>(n=3) | GX-I7<br>120 µg/kg<br>(n=3) | GX-I7<br>240 µg/kg<br>(n=3) | GX-I7<br>480 µg/kg<br>(n=3) | GX-I7<br>720 µg/kg<br>(n=6) | GX-I7<br>960 µg/kg<br>(n=3) | GX-I7<br>1200 µg/kg<br>(n=12) | GX-I7<br>1700 µg/kg<br>(n=2) | Total<br>(n=35)  |
|------------------------------------------------------------------------|----------------------------|-----------------------------|-----------------------------|-----------------------------|-----------------------------|-----------------------------|-------------------------------|------------------------------|------------------|
| <b>Subjects with Treatment-Emergent Adverse Events, n (%) [Events]</b> |                            |                             |                             |                             |                             |                             |                               |                              |                  |
|                                                                        | 3 (100.0) [14]             | 3 (100.0) [30]              | 3 (100.0) [15]              | 3 (100.0) [21]              | 6 (100.0) [35]              | 3 (100.0) [6]               | 12 (100.0) [88]               | 2 (100.0) [16]               | 35 (100.0) [225] |
| <b>Subject with Adverse Drug Reactions, n (%) [Events]</b>             |                            |                             |                             |                             |                             |                             |                               |                              |                  |
|                                                                        | 3 (100.0) [6]              | 2 (66.7) [9]                | 3 (100) [6]                 | 2 (66.7) [8]                | 4 (66.7) [18]               | 2 (66.7) [4]                | 10 (83.3) [49]                | 2 (100.0) [16]               | 28 (80.0) [116]  |
| <b>General disorders and administration site conditions</b>            |                            |                             |                             |                             |                             |                             |                               |                              |                  |
| Injection site reaction                                                | 3 (100.0) [6]              | 5 (66.7) [5]                | 3 (100.0) [3]               | 2 (66.7) [6]                | 3 (50.0) [9]                | 1 (33.3) [3]                | 9 (75.0) [24]                 | 2 (100.0) [5]                | 25 (71.4) [61]   |
| Pyrexia                                                                | 0                          | 1 (33.3) [1]                | 1 (33.3) [1]                | 1 (33.3) [2]                | 1 (16.7) [2]                | 1 (33.3) [1]                | 5 (41.7) [11]                 | 2 (100.0) [3]                | 12 (34.3) [21]   |
| Fatigue                                                                | 0                          | 0                           | 0                           | 0                           | 1 (16.7) [1]                | 0                           | 3 (25.0) [3]                  | 0                            | 4 (11.4) [4]     |
| <b>Skin and subcutaneous tissue disorders</b>                          |                            |                             |                             |                             |                             |                             |                               |                              |                  |
| Rash                                                                   | 0                          | 0                           | 0                           | 0                           | 3 (50.0) [4]                | 0                           | 2 (16.7) [2]                  | 2 (100.0) [2]                | 7 (20.0) [8]     |
| Rash popular                                                           | 0                          | 1 (33.3) [1]                | 0                           | 0                           | 0                           | 0                           | 0                             | 0                            | 1 (2.9) [1]      |
| <b>Immune system disorders</b>                                         |                            |                             |                             |                             |                             |                             |                               |                              |                  |
| Anaphylactic reaction                                                  | 0                          | 0                           | 0                           | 0                           | 0                           | 0                           | 0                             | 1 (50.0) [1]                 | 1 (2.9) [1]      |
| Hypersensitivity                                                       | 0                          | 0                           | 0                           | 0                           | 0                           | 0                           | 0                             | 1 (50.0) [1]                 | 1 (2.9) [1]      |
| <b>Gastrointestinal disorders</b>                                      |                            |                             |                             |                             |                             |                             |                               |                              |                  |

|                          |   |   |   |   |   |   |             |              |             |
|--------------------------|---|---|---|---|---|---|-------------|--------------|-------------|
| Nausea                   | 0 | 0 | 0 | 0 | 0 | 0 | 1 (8.3) [1] | 0            | 1 (2.9) [1] |
| <b>Investigations</b>    |   |   |   |   |   |   |             |              |             |
| Platelet count decreased | 0 | 0 | 0 | 0 | 0 | 0 | 0           | 1 (50.0) [1] | 1 (2.9) [1] |

500  
501  
502  
503  
504  
505  
506  
507  
508  
509  
510  
511  
512  
513  
514  
515  
516  
517  
518  
519

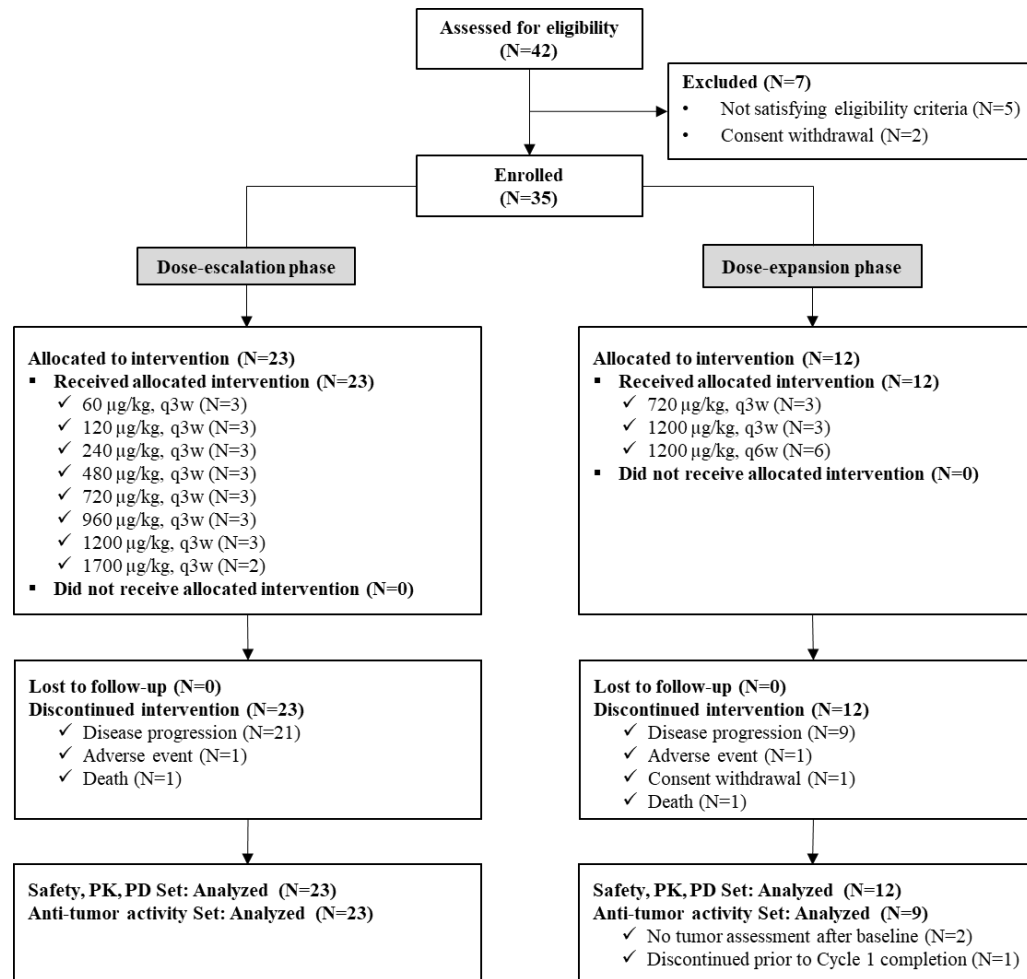

520

521

522 Figure 1. Patient disposition. Patients in the dose-escalation stage were treated with 60, 120, 240, 480, 720, 960, 1200 and 1700 µg/kg of GX-I7  
 523 intramuscularly every 3 weeks (Q3W). In the dose-expansion stage, patients received a 720 and 1200 µg/kg dose of GX-I7 intramuscularly every 3 weeks  
 524 (Q3W) or every 6 weeks (Q6W), which were selected in the dose-escalation stage.

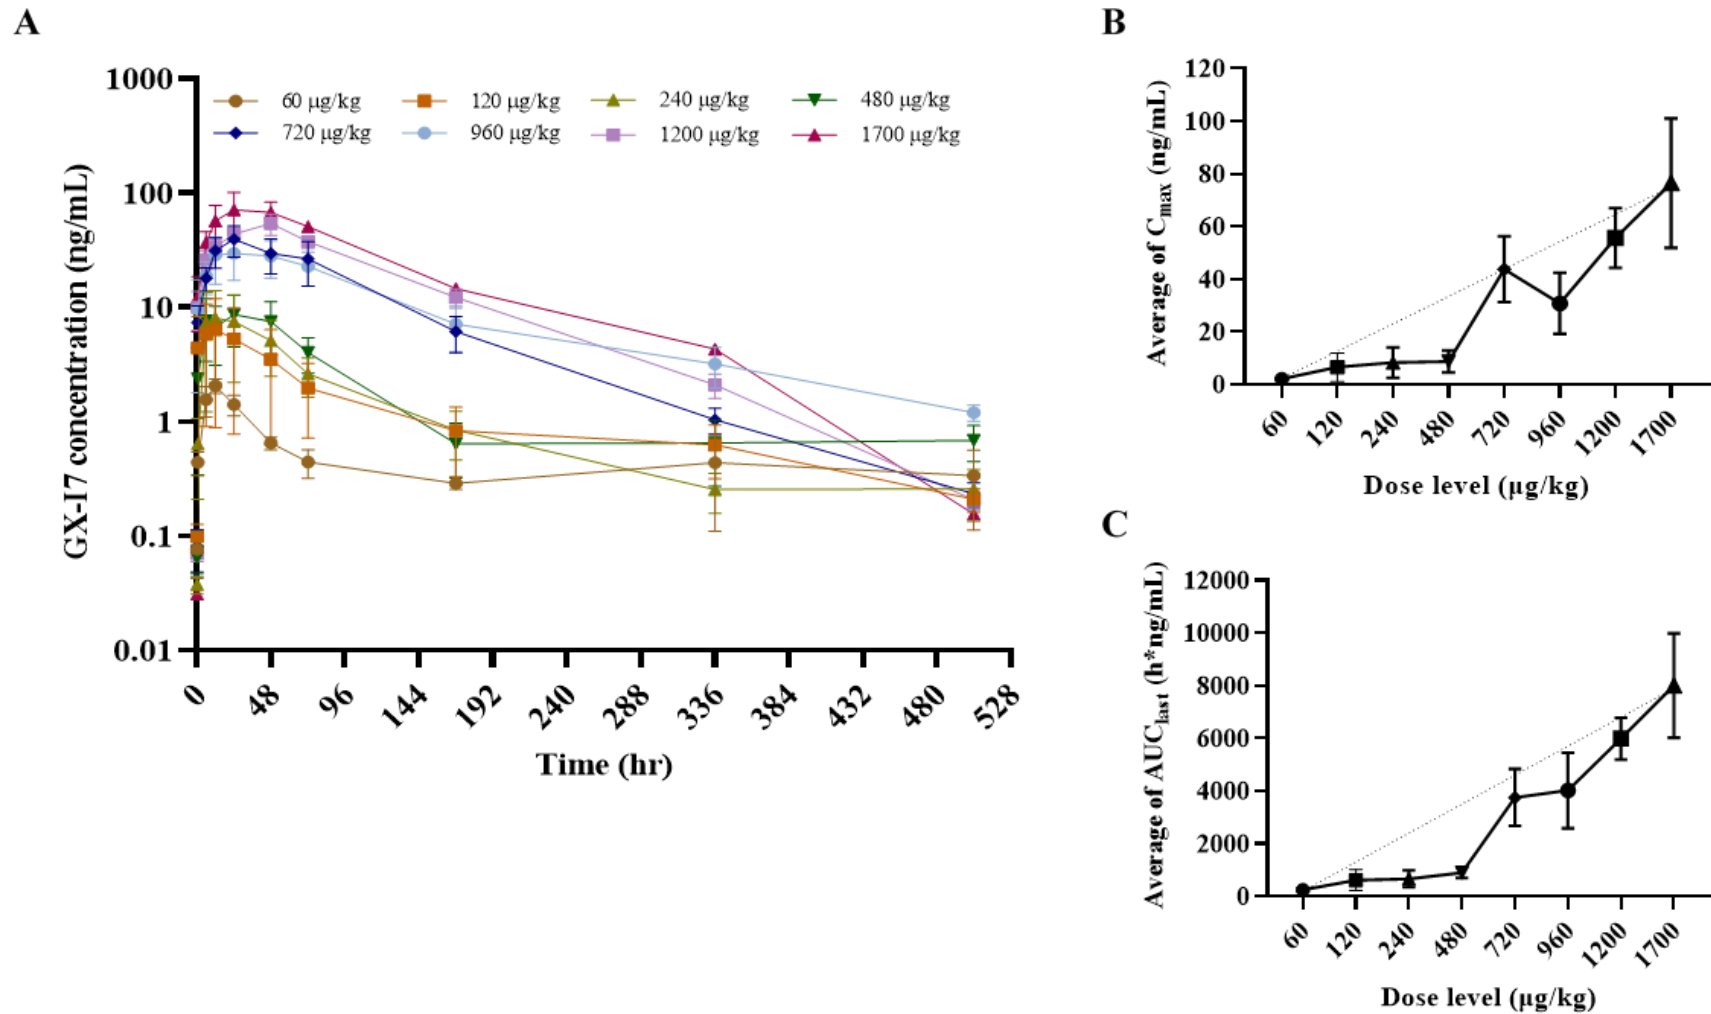

525

526 Figure 2. Pharmacokinetics profiles following the first intramuscular administration of GX-I7 ranging from 60 to 1700  $\mu\text{g/kg}$ . (A) The mean serum  
 527 concentration-time profiles of GX-I7, (B) the maximum concentration ( $C_{max}$ ) versus dose of GX-I7, and (C) the area under the serum concentration-time  
 528 curve from time zero to the last measurable time-point ( $AUC_{last}$ ) versus dose of GX-I7. the results are presented as mean  $\pm$  standard deviation (SD).

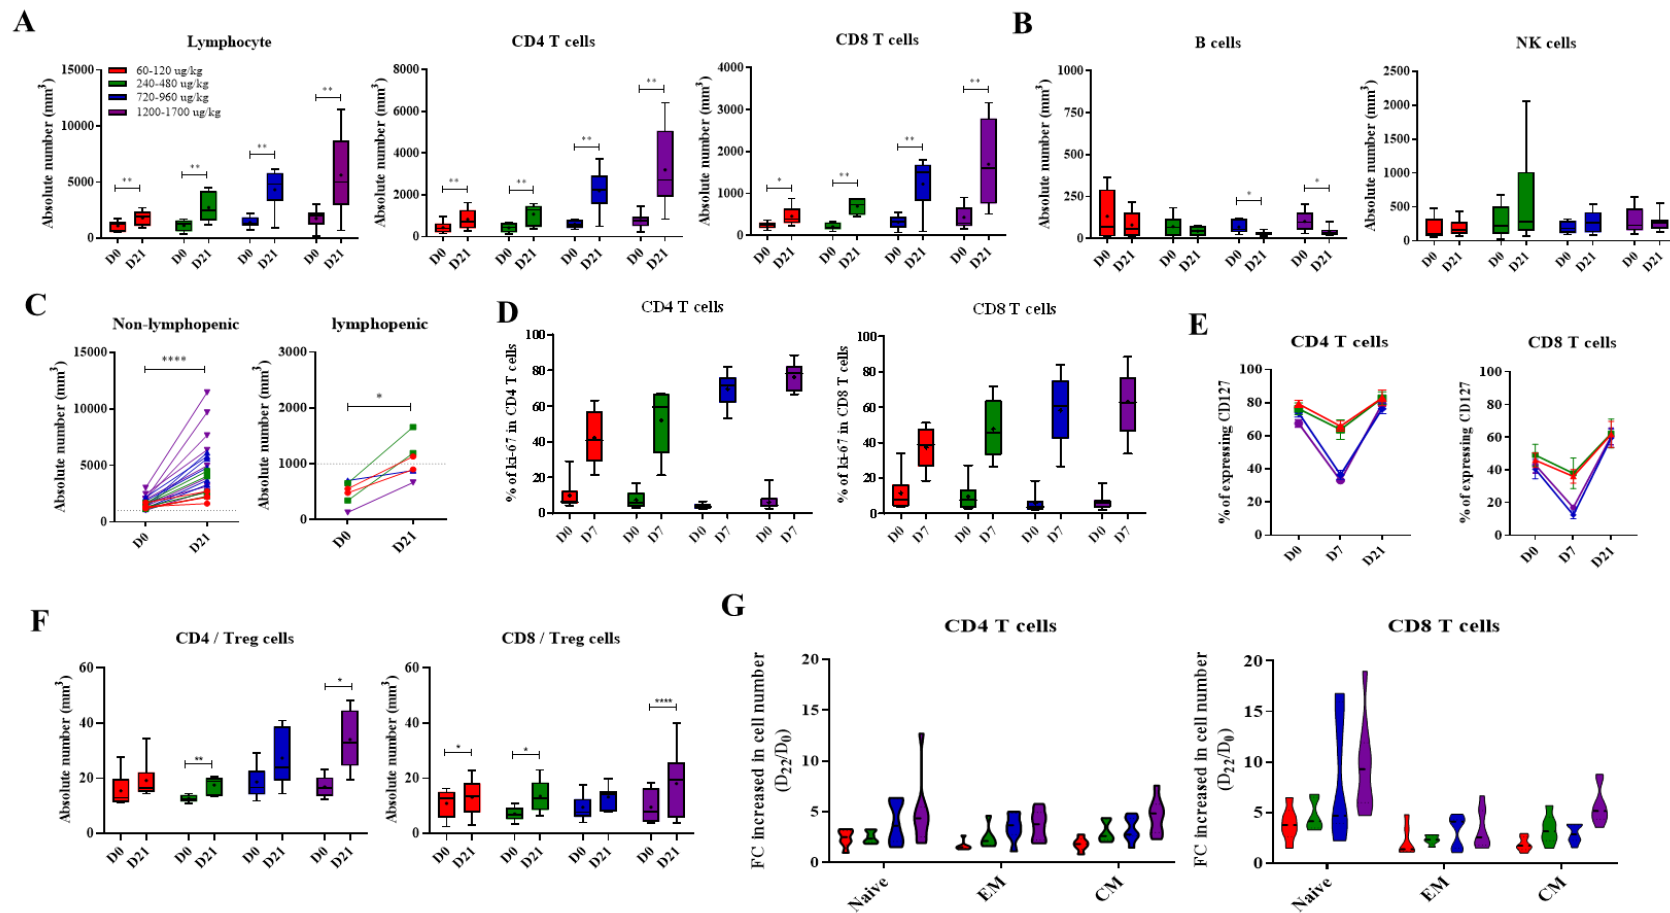

529

530 Figure 3. Pharmacodynamic profiles following the first intramuscular administration of GX-I7 across four groups with difference doses. Changes in (A)  
 531 ALC, CD4<sup>+</sup>, CD8<sup>+</sup> T cells, (B) other immune cells (C) ALC in non-lymphopenic (ALC>1,000 cells/mm<sup>3</sup>) patients and lymphopenic (ALC<1,000 cells/mm<sup>3</sup>)  
 532 patients, (D) percentage (%) of Ki67<sup>+</sup>CD4<sup>+</sup> and Ki67<sup>+</sup>CD8<sup>+</sup> T cells, (E) percentage (%) of CD127<sup>+</sup>CD4<sup>+</sup> and CD127<sup>+</sup>CD8<sup>+</sup> T cells, (F) CD4<sup>+</sup>T/Treg and  
 533 CD8<sup>+</sup>T/Treg cells ratios and (G) sub-sets of CD4<sup>+</sup> and CD8<sup>+</sup> T cells. \*p<0.05, \*\*p<0.01, \*\*\*p<0.001 versus baseline (Day 0) group by Wilcoxon matched-  
 534 pairs signed rank test. FC; fold change.

535  
536  
537  
538  
539  
540  
541  
542  
543  
544  
545  
546  
547  
548  
549  
550  
551  
552

A

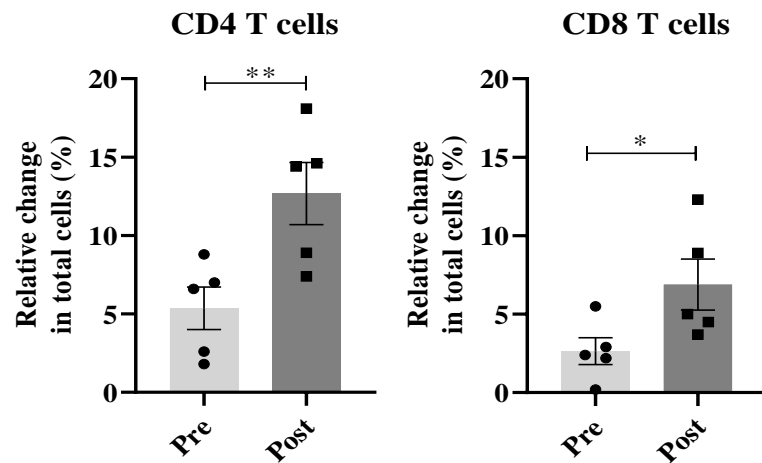

B

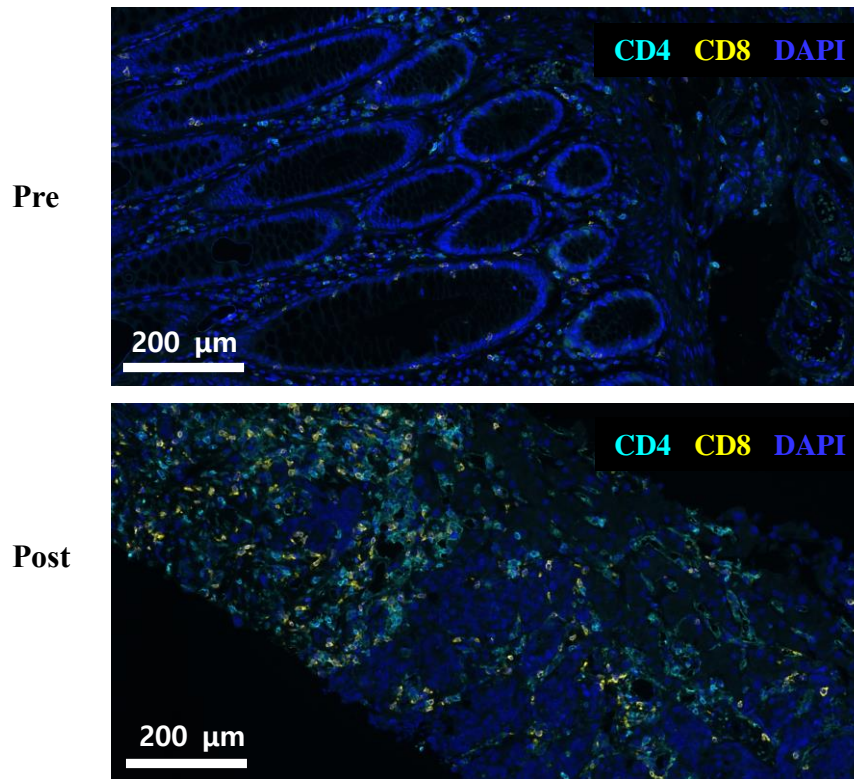

553 Figure 4. T cell subsets evaluation by Multiplex-IHC for tumor microenvironments at baseline (pre) and GX-I7 treatment (post) from solid tumor patients.  
554 All tissue samples were biopsied at the metastasized site, except for one pre-dose sample from one subject. (A) The percentages of infiltrating CD4<sup>+</sup> and  
555 CD8<sup>+</sup> T cells in the whole tumor samples were higher in post specimens. (B) Representative Multiplex-IHC image of pre-treatment (upper) and post-  
556 treatment (lower) in biopsied specimens. Scale bars: 200 μm for IHC and DAPI (blue) was used for nuclear staining. \*p<0.05, \*\*p<0.01 versus baseline  
557 (Day 0) group by Paired t-test.
